# Supplementary material
Source: PubMed Central journal article supplement (PMC5601379)
Supplement: ml7b00284_si_001.pdf [file ml7b00284_si_001.pdf]

**Table 1:** Ratios of curcumin in different time intervals at 25° C, 60%RH\*

| Specification   | Initial                | 3M      | 6M      | 12M     |
|-----------------|------------------------|---------|---------|---------|
| Appearance      | Red yellowish solution | Conform | Conform | Conform |
| Assay% Curcumin | 98.1                   | 98.0    | 96.7    | 96.4    |

**Table 2:** Ratios of curcumin in different time intervals at 40° C, 75%RH\*

| Specification   | Initial                | 1M      | 3M      | 6M      |
|-----------------|------------------------|---------|---------|---------|
| Appearance      | Red yellowish solution | Conform | Conform | Conform |
| Assay% Curcumin | 98.1                   | 97.0    | 95.7    | 93.4    |

\*: Authors would like to thank Mr. Serhan Simsek, CT Pharma and Biotechnology Research and Development for providing above data.

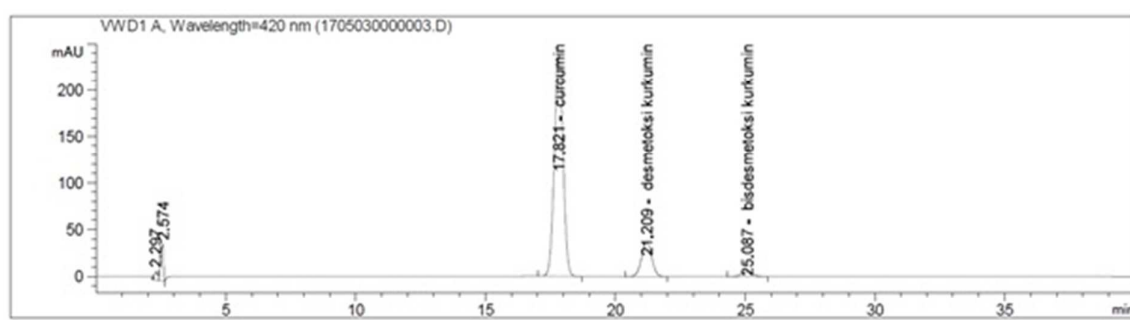

**Figure 1:** HPLC Chromatogram of Curcuminoids content of the Compounding Pharmacy Formulation at Initial Point

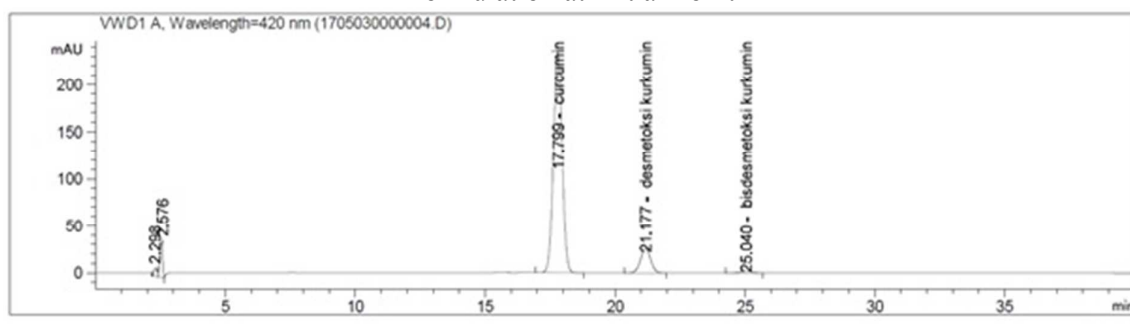

**Figure 2:** HPLC Chromatogram of Curcuminoids content of the Compounding Pharmacy Formulation at after 12 Month, stored at 25°C 65%RH
